# Supplementary material
Source: MDPI journal article supplement (https://www.mdpi.com/2073-4395/12/11/2849)
Supplement: s1 [file s1 › Table S1.pdf]

Table S1. Number and name of the 25 varieties in the seedling test

| No. | Strongly drought-resistant varieties | No. | Drought-resistant varieties | No. | Non-drought tolerant varieties |
|-----|--------------------------------------|-----|-----------------------------|-----|--------------------------------|
| 42  | Jingu 119                            | 12  | Zhongke 804                 | 1   | Jipinlongxiang 180             |
| 43  | Changjing 616                        | 20  | Suidao 3                    | 2   | Daohuaxiang 8                  |
| 47  | Wokeshou 1                           | 54  | Longjing 21                 | 3   | Longdao 16                     |
| 49  | Longyang 19                          | 57  | Hongke 88                   | 5   | Songjing 16                    |
| 51  | Longdao 202                          | 60  | Jingnongda 168              | 18  | Suidao 9                       |
| 52  | Suijing 27                           |     |                             | 24  | Lianyu 1013                    |
| 53  | Suijing 18                           |     |                             | 29  | Longjing 1525                  |
| 55  | Longdao 18                           |     |                             | 31  | Beidao 1                       |
| 65  | Tonghuayuan                          |     |                             | 32  | Longnian 588                   |
| 67  | Hanxiang 7                           |     |                             | 62  | Tongyuanxiang 518              |
