# Supplementary material
Source: MDPI journal article supplement (https://www.mdpi.com/2073-4395/12/11/2849)
Supplement: s1 [file s1 › Table S2.pdf]

Table S2. Correlation analysis of drought survival proportion and other traits in various rice varieties under drought stress

|      | LA    | 1LFT<br>LL | 1LFT<br>LW | 1LFT<br>LA | 2LFT<br>LL | 2LFT<br>LW | 2LF<br>TLA | RL     | PH   | SDW    | RDW    | RSR  | D<br>SP |
|------|-------|------------|------------|------------|------------|------------|------------|--------|------|--------|--------|------|---------|
| L    | 1     |            |            |            |            |            |            |        |      |        |        |      |         |
| A    |       |            |            |            |            |            |            |        |      |        |        |      |         |
| 1LFT | 0.558 | 1          |            |            |            |            |            |        |      |        |        |      |         |
| LL   | *     |            |            |            |            |            |            |        |      |        |        |      |         |
| 1LFT |       |            | 1          |            |            |            |            |        |      |        |        |      |         |
| LW   | 0.251 | 0.392      |            |            |            |            |            |        |      |        |        |      |         |
| 1LFT |       | 0.858      | 0.712      |            |            |            |            |        |      |        |        |      |         |
| LA   | 0.347 | **         | **         | 1          |            |            |            |        |      |        |        |      |         |
| 2LFT |       |            | 0.449      | 0.482      |            |            |            |        |      |        |        |      |         |
| LL   | 0.255 | 0.276      | *          | *          | 1          |            |            |        |      |        |        |      |         |
| 2LFT |       |            |            |            | 0.64*      |            |            |        |      |        |        |      |         |
| LW   | 0.577 | 0.295      | 0.288      | 0.303      | *          | 1          |            |        |      |        |        |      |         |
|      | *     |            |            |            | *          |            |            |        |      |        |        |      |         |
| 2LFT |       |            |            | 0.555      | 0.929      | 0.742*     |            |        |      |        |        |      |         |
| LA   | 0.278 | 0.382      | 0.377      | *          | **         | *          | 1          |        |      |        |        |      |         |
|      |       |            |            |            |            |            |            |        |      |        |        |      |         |
| RL   | -     | 0.245      | -          | 0.28       | 0.04       | -0.202     | 0.12       | 1      |      |        |        |      |         |
|      | 0.127 |            | 0.073      |            |            |            | 6          |        |      |        |        |      |         |
| PH   | 0.444 | 0.392      | 0.326      | 0.41       | 0.472      | 0.498*     | 0.49       | 0.013  | 1    |        |        |      |         |
|      | *     |            |            |            | *          |            | 3*         |        |      |        |        |      |         |
| SDW  | 0.499 | 0.577      | 0.347      | 0.577      | 0.359      | 0.425      | 0.50       | -0.124 | 0.35 | 1      |        |      |         |
|      | *     | **         |            | **         |            |            | 8*         |        | 8    |        |        |      |         |
| RD   | -     | 0.187      | -          | 0.108      | -0.239     | -          | -          |        | -    |        |        |      |         |
| W    | 0.091 |            | 0.131      |            |            | 0.482*     | 0.28       | 0.37   | 0.11 | -0.047 | 1      |      |         |
|      |       |            |            |            |            |            | 5          |        | 4    |        |        |      |         |
|      | -     |            | -          | -          |            | -          | -          |        | -    |        |        |      |         |
| RSR  | 0.456 | -0.218     |            |            | -0.38      | 0.636*     | 0.48       | 0.318  | 0.40 | -      | 0.794* | 1    |         |
|      | *     |            | 0.253      | 0.233      |            | *          | *          |        | 2    | 0.559* | *      |      |         |
|      |       |            |            |            |            |            |            |        |      |        |        |      |         |
| DSP  | -     | 0.139      | -          | 0.055      | -0.159     | -0.351     | 0.10       | 0.638  | -    | -0.061 | 0.585* | 0.41 | 1       |
|      | 0.146 |            | 0.372      |            |            |            | 6          | **     | 0.05 |        | *      | 9    |         |

Note.LA,leaf age;1LFTLL,1st leaf from top leaf length;1LFTLW,1st leaf from top leaf width; 1LFTLA,1st leaf from top leaf area;2LFTLL,2st leaf from top leaf length;2LFTLW,2st leaf from top leaf width;2LFTLA,2st leaf from top leaf area;RL,root length;PH,plant height;SDW,shoot dry weight;RDW,root dry weight;RSR, root shoot ratio;DSP,drought survival proportion.
