# Supplementary material
Source: MDPI journal article supplement (https://www.mdpi.com/2073-4395/12/11/2849)
Supplement: s1 [file s1 › Table S3.pdf]

Table S3. Descriptive statistical analysis of drought stress on various traits in rice

| Characters | Treatment | Min   | Max   | Average | standard deviation | coefficient of variation |
|------------|-----------|-------|-------|---------|--------------------|--------------------------|
| LA         | Control   | 3.06  | 3.85  | 3.33    | 0.25               | 7.51                     |
|            | Drought   | 2.26  | 3.82  | 3.00    | 0.45               | 15.00                    |
| 1LFTLL     | Control   | 4.78  | 10.76 | 6.55    | 1.60               | 24.43                    |
|            | Drought   | 4.04  | 7.92  | 5.66    | 1.06               | 18.73                    |
| 1LFTLW     | Control   | 0.20  | 0.33  | 0.24    | 0.04               | 14.58                    |
|            | Drought   | 0.20  | 0.28  | 0.23    | 0.02               | 10.43                    |
| 1LFTLA     | Control   | 0.73  | 2.62  | 1.21    | 0.48               | 39.67                    |
|            | Drought   | 0.70  | 1.43  | 0.97    | 0.20               | 20.62                    |
| 2LFTLL     | Control   | 5.50  | 9.28  | 7.07    | 1.32               | 18.67                    |
|            | Drought   | 4.84  | 8.12  | 6.65    | 1.18               | 17.74                    |
| 2LFTLW     | Control   | 0.22  | 0.38  | 0.27    | 0.04               | 13.33                    |
|            | Drought   | 0.20  | 0.30  | 0.26    | 0.04               | 16.92                    |
| 2LFTLA     | Control   | 1.02  | 2.18  | 1.46    | 0.36               | 24.66                    |
|            | Drought   | 0.73  | 1.91  | 1.30    | 0.39               | 30.00                    |
| RL         | Control   | 3.54  | 8.76  | 6.63    | 1.50               | 22.60                    |
|            | Drought   | 3.82  | 7.78  | 5.88    | 1.23               | 20.93                    |
| PH         | Control   | 10.73 | 16.30 | 13.19   | 1.52               | 11.52                    |
|            | Drought   | 8.93  | 14.58 | 11.67   | 1.76               | 15.08                    |
| SDW        | Control   | 0.12  | 0.04  | 0.02    | 0.01               | 28.66                    |
|            | Drought   | 0.01  | 0.03  | 0.02    | 0.01               | 27.73                    |
| RDW        | Control   | 0.03  | 0.07  | 0.04    | 0.01               | 35.07                    |
|            | Drought   | 0.02  | 0.05  | 0.03    | 0.01               | 30.19                    |
| RSR        | Control   | 0.20  | 2.63  | 1.71    | 0.68               | 39.85                    |
|            | Drought   | 0.50  | 2.74  | 1.72    | 0.65               | 38.01                    |

Note.LA,leaf age;1LFTLL,1st leaf from top leaf length;1LFTLW,1st leaf from top leaf width; 1LFTLA,1st leaf from top leaf area;2LFTLL,2st leaf from top leaf length;2LFTLW,2st leaf from top leaf width;2LFTLA,2st leaf from top leaf area;RL,root length;PH,plant height;SDW,shoot dry weight;RDW,root dry weight;RSR, root shoot ratio.
